# Supplementary material for: Simple and facile one-step synthesis of bowl-like hollow ZSM-5 zeolites
Source: Royal Society of Chemistry journal article supplement (doi:10.1039/d1ce01005k), 2021-01-01
Supplement: d1ce01005k1.pdf [file d1ce01005k1.pdf]

## Supplementary Information

### Simple and facile one-step synthesis of bowl-like hollow ZSM-5 zeolites

Peng Zhu,<sup>a</sup> Yuan Zhang,<sup>b\*</sup> Cun Liu,<sup>a</sup> Jinshan Wang,<sup>a</sup> Yafei Zhang,<sup>a</sup> Wei Zhang,<sup>c\*</sup> Haiou  
Liu,<sup>a</sup> and Xiongfeng Zhang<sup>a\*</sup>

<sup>a</sup> State Key Laboratory of Fine Chemicals, School of Chemical Engineering, Dalian University  
of Technology, Dalian, 116024, China

<sup>b</sup> Research Institute of Yanchang Petroleum (Group) Co., Ltd., Xi'an 710065, China

<sup>c</sup> Shaanxi Yanchang Petroleum (Group) Co., Ltd. Dalian Institute of Chemical Physics Xi'an  
Clean Energy (Chemical) Research Institute, Xi'an 710065, China

**\*CORRESPONDENCE:**

**Yuan Zhang** , E-mail: yuanzi719@163.com (Y. Zhang)

**Wei Zhang** , E-mail: ycsy\_zw@163.com (W. Zhang)

**Xiongfeng Zhang** , E-mail: xfzhang@dlut.edu.cn (X. Zhang)

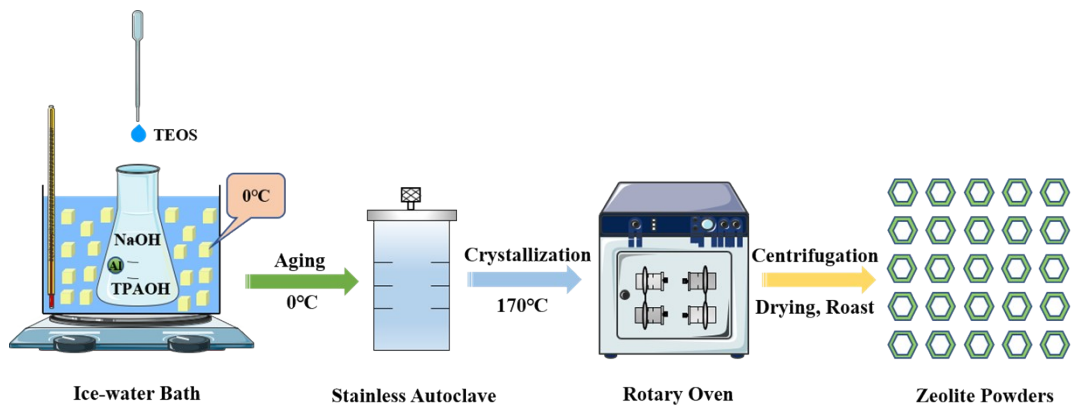

**Fig. S1.** The synthesis process of hollow single crystal ZSM-5 zeolite.

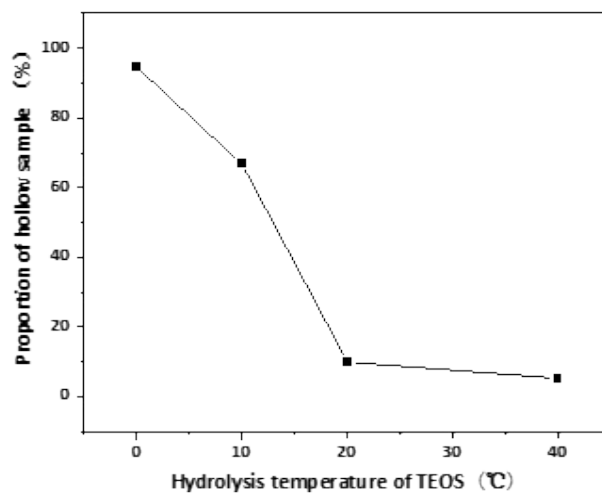

**Fig. S2.** Hollow proportion of the products synthesized at 170°C for 24h under different TEOS hydrolysis temperature.

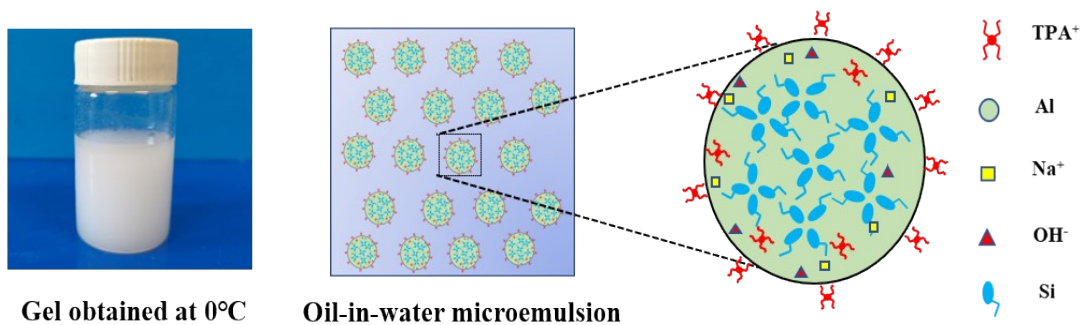

**Fig. S3.** Gel composed of oil-in-water microemulsion.

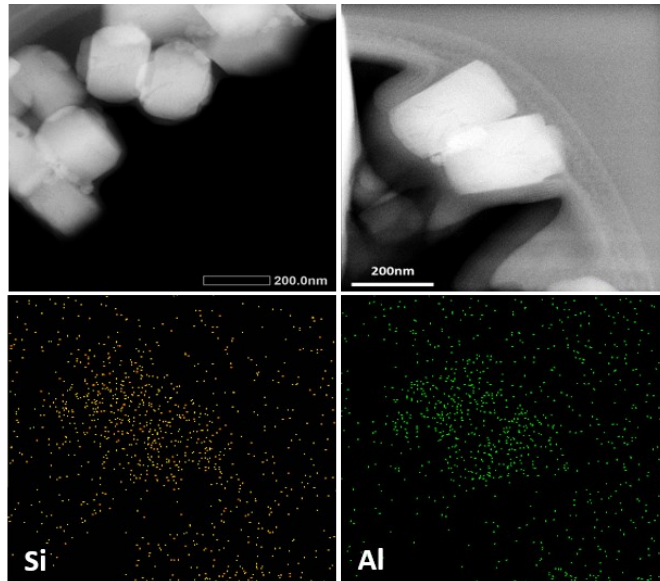

**Fig. S4.** TEM EDX Mapping analysis of conventional solid ZSM-5 crystals obtained under the TEOS hydrolysis temperature of 40°C.

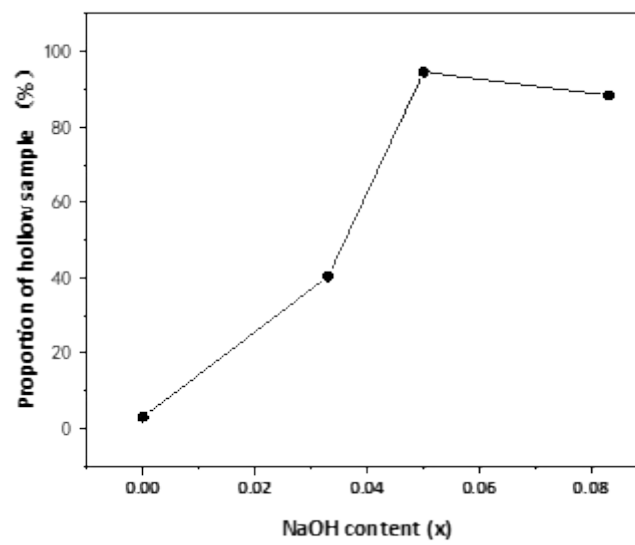

**Fig. S5.** Hollow proportion of the products with different NaOH/SiO<sub>2</sub> mole ratios.
